# Supplementary material for: Design of super-strong and thermally stable nanotwinned Al alloys via solute synergy
Source: Royal Society of Chemistry journal article supplement (doi:10.1039/d0nr05707j), 2020-01-01
Supplement: d0nr05707j1.pdf [file d0nr05707j1.pdf]

## Design of super-strong and thermally stable nanotwinned Al alloys via solute synergy

### Supplementary Materials

Y.F. Zhang<sup>\*a</sup>, R. Su<sup>a</sup>, Dongyue Xie<sup>c</sup>, T.J. Niu<sup>a</sup>, S. Xue<sup>a</sup>, Q. Li<sup>a</sup>, Z. Shang, J. Ding<sup>a</sup>, N.A. Richter<sup>a</sup>, Jian Wang<sup>c</sup>, H. Wang<sup>a, b</sup>, X. Zhang<sup>\*a</sup>

<sup>a</sup> School of Materials Engineering, Purdue University, West Lafayette, IN 47907, United States

<sup>b</sup> School of Electrical and Computer Engineering, Purdue University, West Lafayette, IN 47907

<sup>c</sup> Mechanical and Materials Engineering, University of Nebraska-Lincoln, Lincoln, NE 68588, USA

\*Corresponding author: X. Zhang, [xzhang98@purdue.edu](mailto:xzhang98@purdue.edu); Y.F. Zhang, [zhan2592@purdue.edu](mailto:zhan2592@purdue.edu);

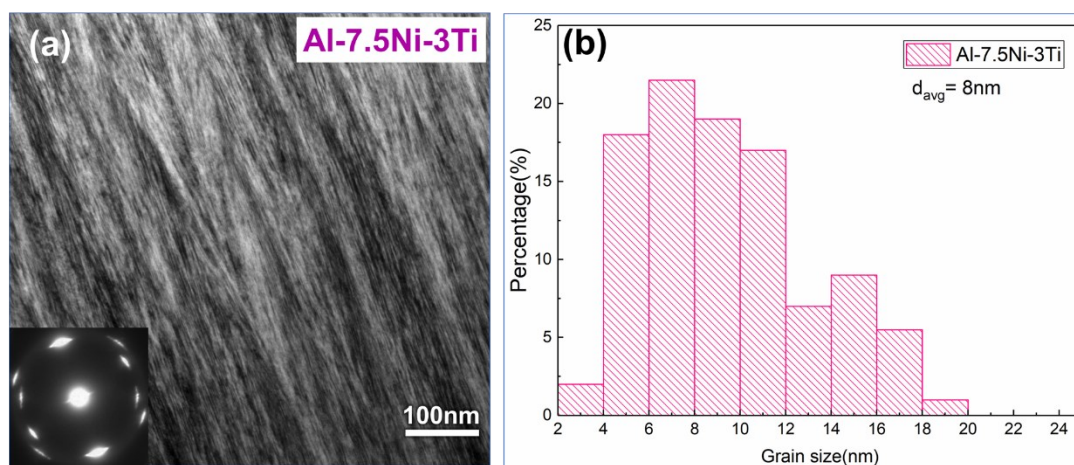

Figure S1. (a) Low-mag XTEM micrograph with SAD pattern revealing the NT columnar structure in the Al-7.5Ni-3Ti. (b) The corresponding statistics showing an average grain size of 8 nm.

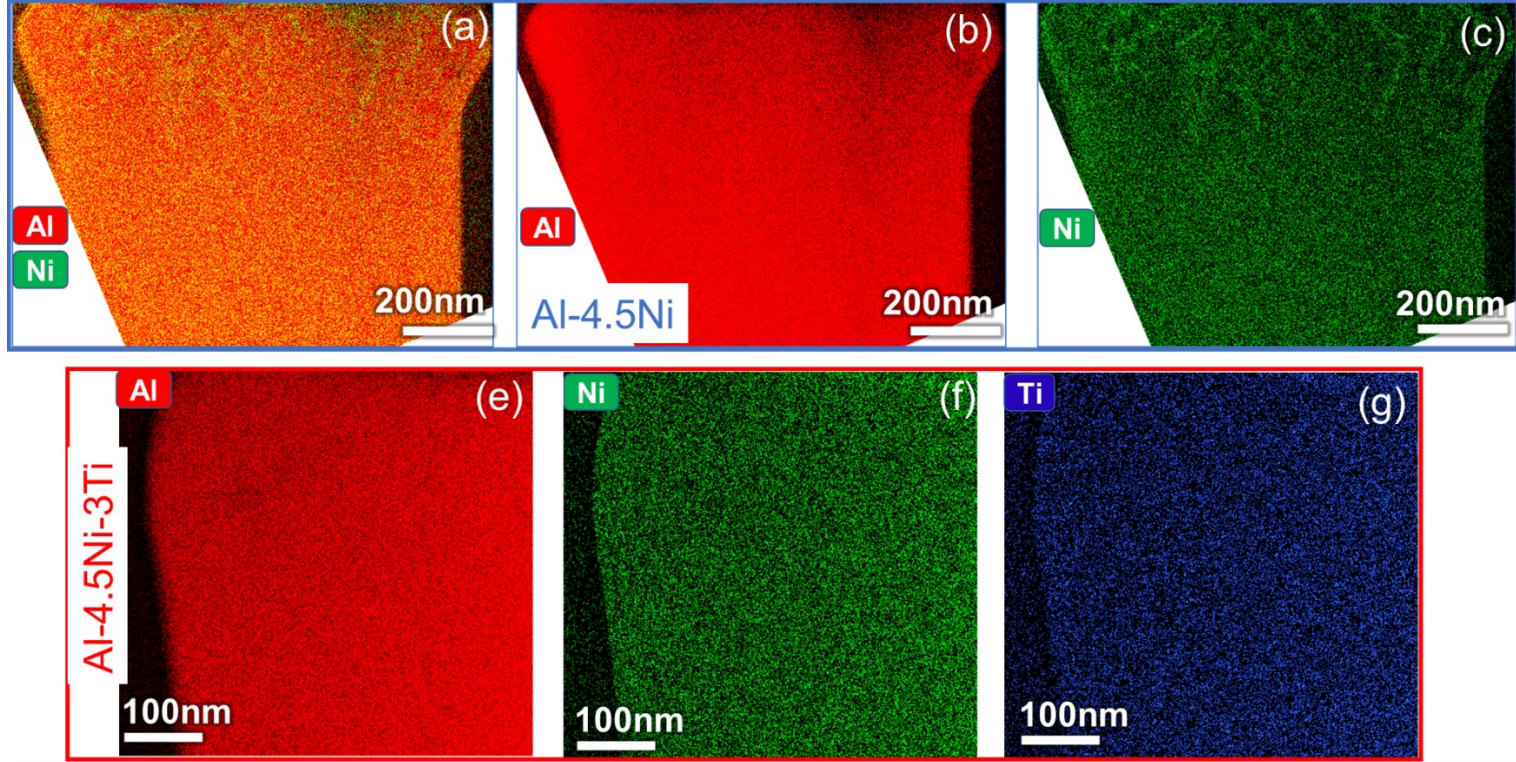

Figure S2. (a-c) EDS maps showing the Ni segregation at the top of deformed Al-4.5Ni pillar. (e-g) EDS maps demonstrating the uniform distribution of Al, Ni and Ti in the deformed Al-4.5Ni-3Ti pillar.

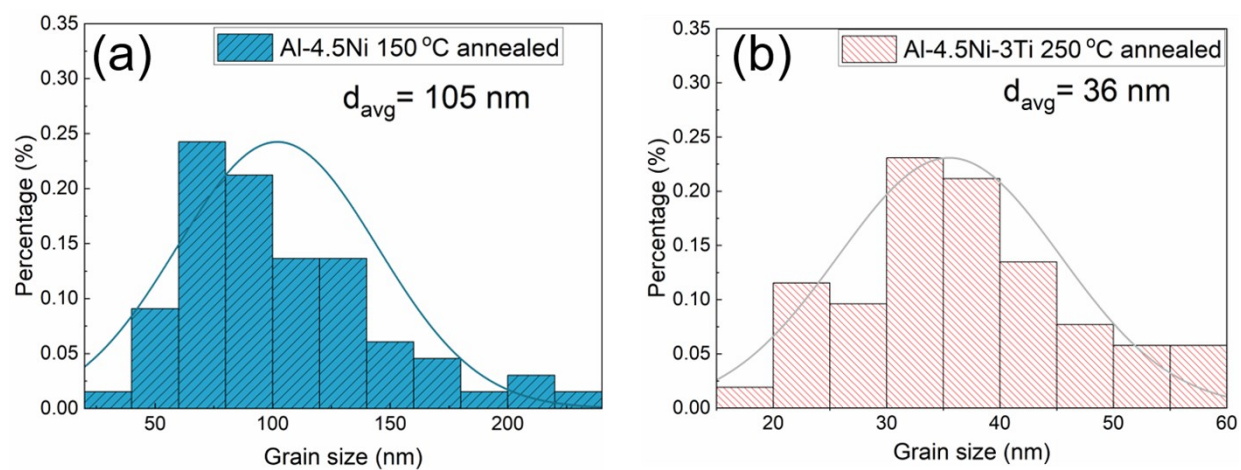

Figure S3. Statistics showing grain size distributions in annealed Al-4.5Ni (a), and annealed Al-4.5Ni-3Ti alloys.

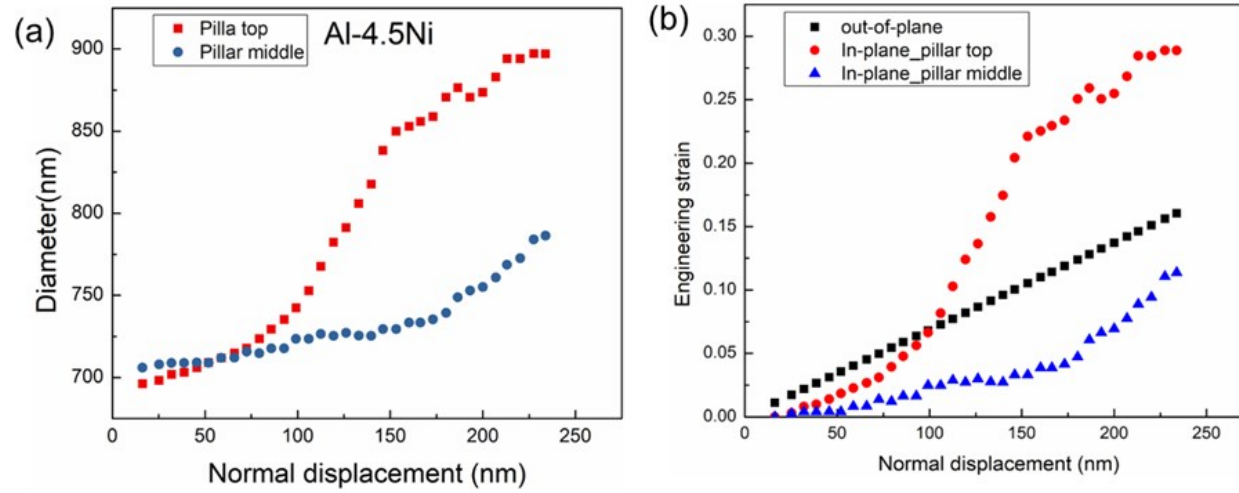

Figure S4. (a) Instantaneous diameters on the top and middle of Al-4.5Ni pillar. (b) In-plane and out-of-plane strains plotted as a function of normal displacement for Al-4.5Ni pillar.

Supplementary Video 1. In situ SEM video showing the micropillar compression of Al-4.5Ni up to 16% engineering strain.

Supplementary Video 2. Pillar compression of Al-4.5Ni-3Ti up to 16% engineering strain.
